# Supplementary figures and images for: The Gastric Mucosa from Patients Infected with CagA+ or VacA+ Helicobacter pylori Has a Lower Level of Dual Oxidase-2 Expression than Uninfected or Infected with CagA−/VacA− H. pylori
Source: Springer Nature journal article supplement (doi:10.1007/s10620-016-4144-z), 2016-04-05

Supplementary materials for figure 2

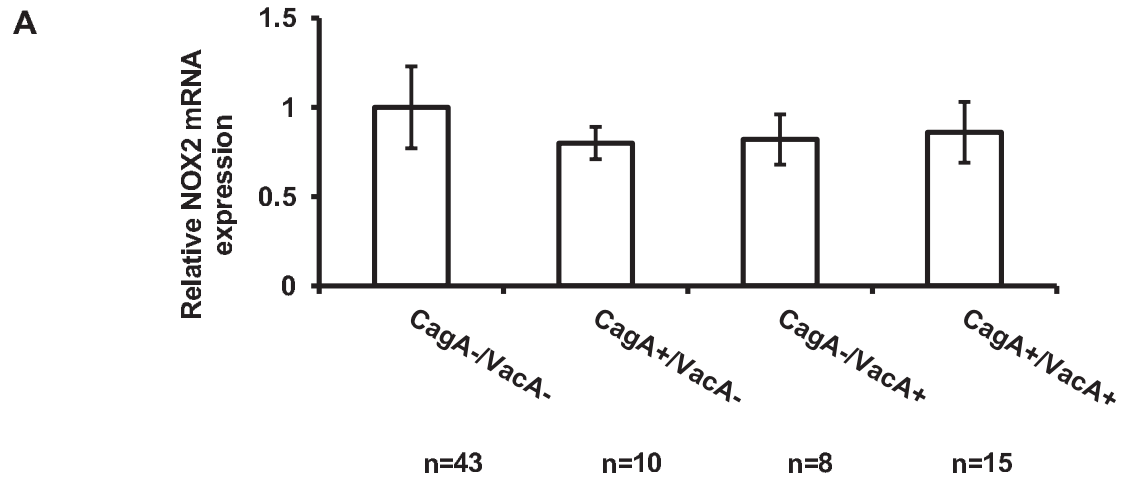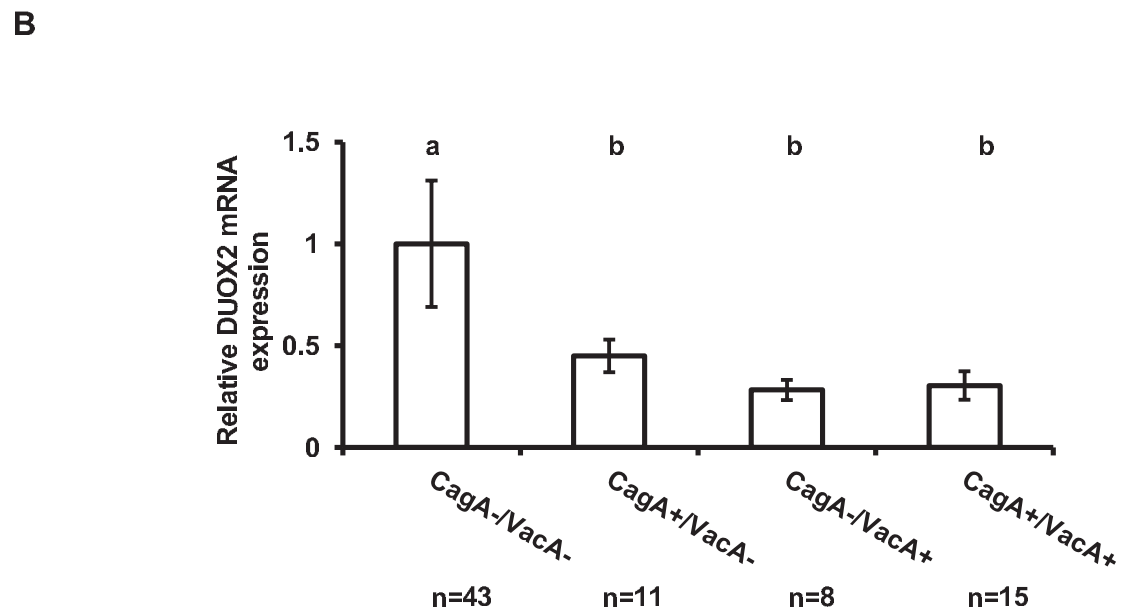

Supplement: MOESM1 [file 10021238]
